# Supplementary material
Source: publisher figshare collection journal article supplement (https://frontiersin.figshare.com/ndownloader/files/26125286)
Supplement: Supplementary file 1 [file 26125286]

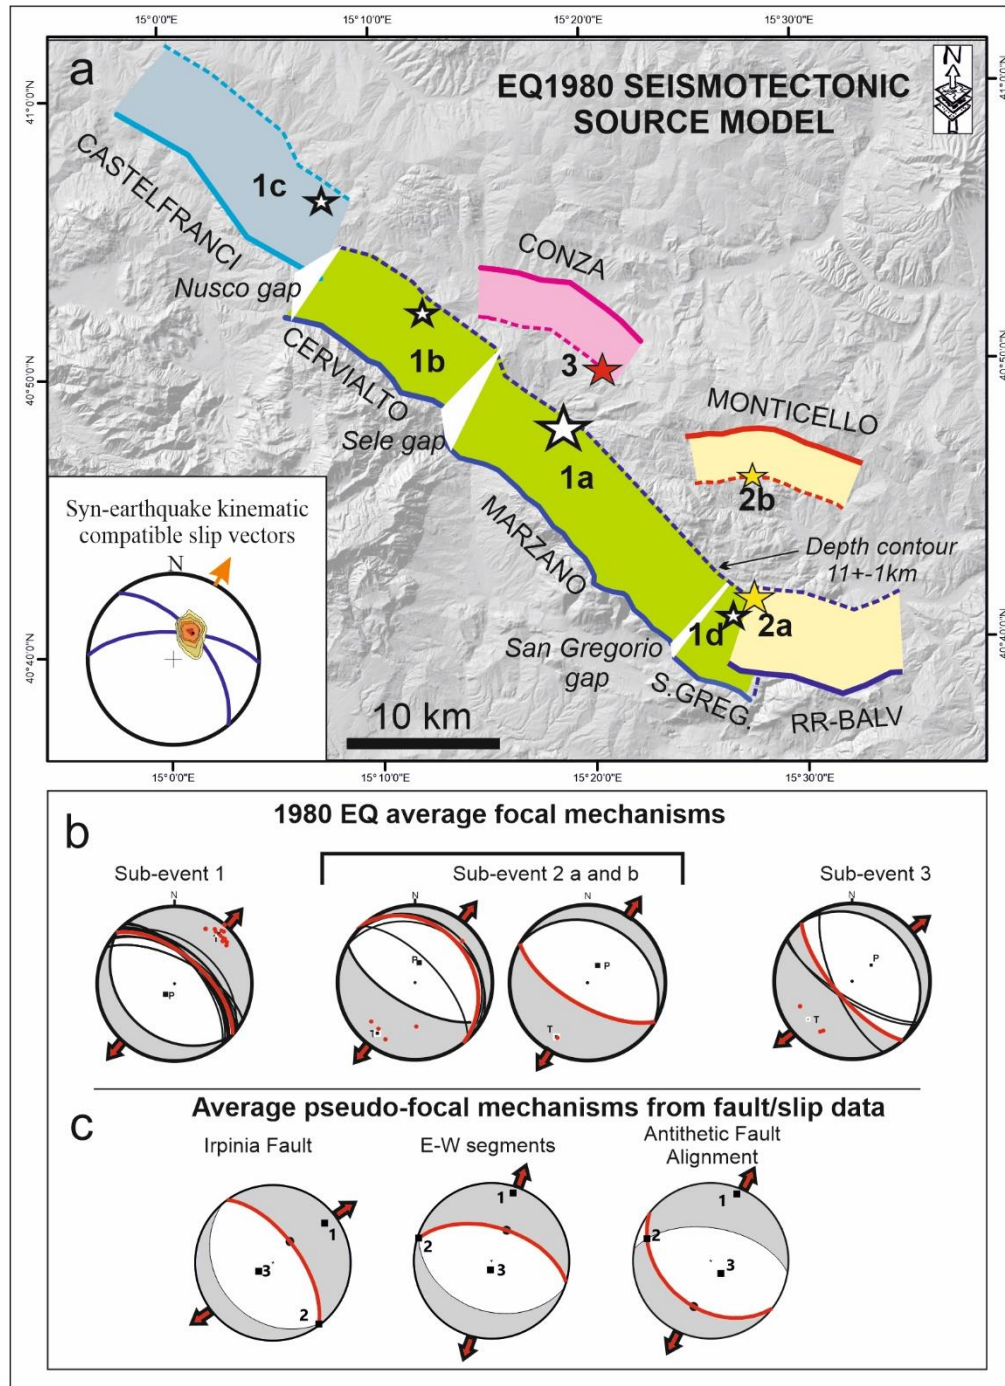

**Figure S6.** Box representation of the 3D seismotectonic model of [Figure 12](#) in the main text. **(A)** Fault detailed segmentation pattern and link with sub-events and seismic episodes characterizing 1980 EQ. **(B)** Average focal mechanisms of the sub-event 1 (0 to 18 sec), sub-event 2 (20 sec) and sub-event 3 (40 sec from a compilation of data in the literature resumed in [Table S3](#) and in [Figure 2A](#). **(C)** Pseudo focal mechanism derived from data represented in the stereoplots of [Figure 5A](#).
